# Supplementary material for: Oxytocin shapes spontaneous activity patterns in the developing visual cortex by activating somatostatin interneurons
Source: bioRxiv or medRxiv preprint supplement (doi:10.1101/866251), 2019-12-06
Supplement: Supplementary file [file media-1.pdf]

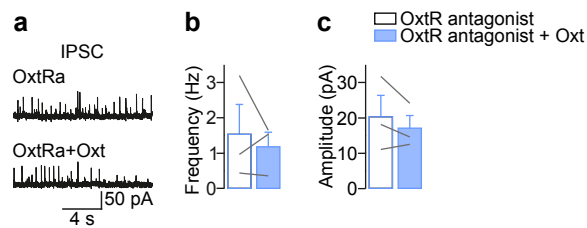

**Supplementary Figure 1.** The oxytocin receptor mediates the increase in sIPSC frequency after oxytocin application.

**a.** V1 sIPSCs in the presence of the oxytocin receptor antagonist (desGly-NH<sub>2</sub>,d(CH<sub>2</sub>)<sub>5</sub>[D-Tyr<sub>2</sub>,Thr<sub>4</sub>]OVT, donation from Maurice Manning, 50 μM) before (top) and after applying oxytocin (bottom).

**b.** When oxytocin receptors were blocked, oxytocin failed to increase the frequency of sIPSCs. N = 3 cells (p > 0.05, Wilcoxon test).

**c.** Amplitude of sIPSCs in the presence of the oxytocin receptor antagonist before and after oxytocin application. N = 3 cells (p > 0.05, Wilcoxon test).

**a****Excitatory neurons**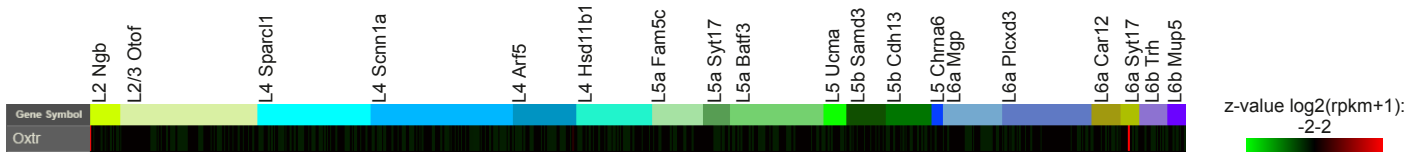**Inhibitory neurons**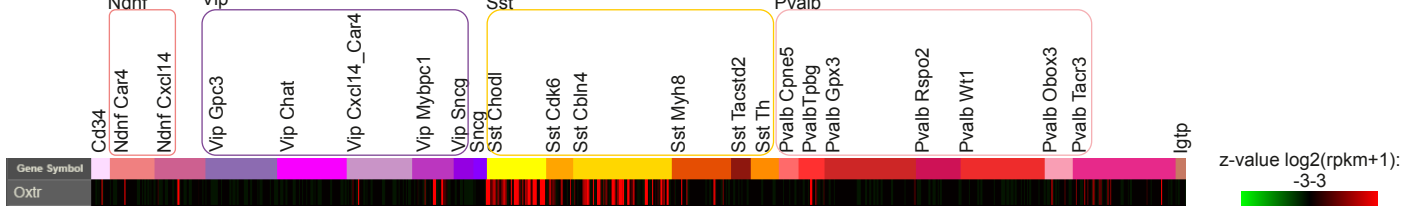**Non-neuronal cells**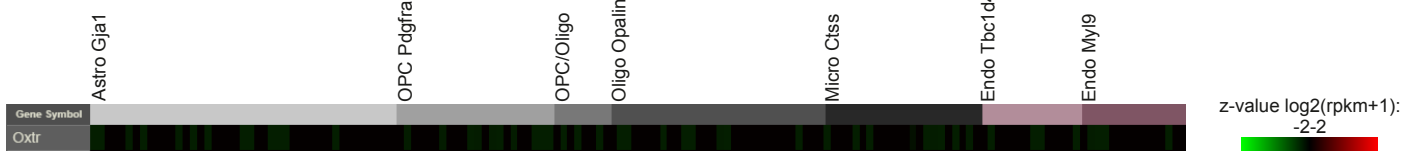**Supplementary Figure 2a. Adult visual cortex transcriptome.**

**a.** Single cell RNA-sequencing of adult visual cortex for the oxytocin receptor gene (*Oxtr*). *Oxtr* is only expressed in interneurons, in particular in those of the somatostatin-expressing type. Adapted with permission from the Allen Brain Institute, Tasic et al., 2016, Allen Brain Atlas data portal: <http://casestudies.brain-map.org/celltax>.

**b**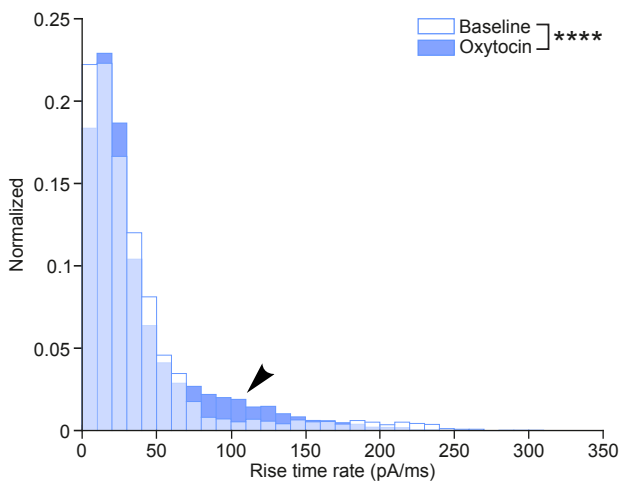**Supplementary Figure 2b. V1 sIPSC kinetics.**

**b.** Rise time rate histogram of V1 sIPSCs. Oxytocin shifted the histogram to the left. N = 8 cells. Kolmogorov-Smirnov test, \*\*\*\*p < 0.0001.

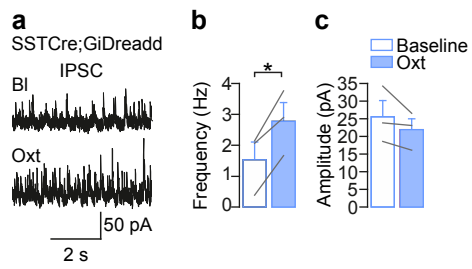

**Supplementary Figure 3.** Oxytocin increases the frequency of sIPSCs in SSTCre;GiDreadd mice.

**a.** sIPSCs before and after oxytocin application from a V1 layer2/3 pyramidal cell SSTCre;GiDreadd mouse in the absence of CNO.

**b.** sIPSC frequency. Oxytocin led to an increase in the frequency. N = 3 cells. paired two-tailed t-test, \*p < 0.05.

**c.** Amplitudes of sIPSCs.
